# Supplementary material
Source: publisher figshare collection journal article supplement (https://sage.figshare.com/ndownloader/files/24128655)
Supplement: Supplementary file 1 [file 24128655]

**Supporting Table S1: Characteristics of tumors**

| <b>Author<br/>Year</b> | <b>Group</b> | <b>Diameter, (cm)</b> | <b>Number, (%)</b>  | <b>Capsule, (%)</b> | <b>Differentiation, (%)</b> | <b>AFP, (ng/mL)</b> |
|------------------------|--------------|-----------------------|---------------------|---------------------|-----------------------------|---------------------|
| Wang H                 | PA-TACE      | 3.84 ± 1.27           | Multiple: 44(100.0) | 31 (70.5)           | NR                          | 357.00±444.12       |
| 2018                   | HA           | 3.83 ± 1.09           | Multiple: 84(100.0) | 50 (59.5)           | NR                          | 367.45±474.58       |
| Ye JZ                  | PA-TACE      | > 5: 45 (52.3%)       | Single: 73(84.9)    | 51 (59.3)           | Edmondson 1-2: 49 (57)      | > 400: 37 (43.0)    |
| 2017                   | HA           | > 5: 98 (56.3%)       | Single: 137(78.7)   | 105 (60.3)          | Edmondson 1-2: 91(52.3)     | > 400: 85 (48.9)    |
| Sun JJ                 | PA-TACE      | 6.511 ± 0.2682        | Single: 126(92.0)   | 11 (8.0)            | Edmondson 1-2: 13(9.5)      | > 400: 58 (42.3)    |
| 2016                   | HA           | 6.993 ± 0.2898        | Single: 168(90.8)   | 17 (9.2)            | Edmondson 1-2: 10(5.4)      | > 400: 91 (49.2)    |
| Li KW                  | PA-TACE      | > 5: 21(60%)          | Single: 25 (71.4)   | 25(71.4)            | Edmondson 1-2: 24(68.6)     | ≥ 400: 25 (71.4)    |
| 2012                   | HA           | > 5: 26(63.4%)        | Single: 29 (70.7)   | 28(68.3)            | Edmondson 1-2: 30(73.2)     | ≥ 400: 27(65.9)     |
| Wei W                  | PA-TACE      | > 10: 34 (29.3%)      | NR                  | NR                  | NR                          | ≥ 25: 79 (68.1)     |
| 2018                   | HA           | > 10: 21 (17.8%)      | NR                  | NR                  | NR                          | ≥ 25: 82 (69.5)     |
| Qi YP                  | PA-TACE      | > 5: 71(88%)          | Single: 68 (74.7)   | 59(64.8)            | NR                          | ≥ 400: 44(48.4)     |
| 2018                   | HA           | > 5: 75(68.8%)        | Single: 84 (77.1)   | 61(56.0)            | NR                          | ≥ 400: 50(45.9)     |
| Wang YY                | PA-TACE      | 6                     | Single: 46 (81)     | NR                  | Edmondson 1-2: 41 (72)      | ≥ 200: 25 (44)      |
| 2018                   | HA           | 6                     | Single: 46 (81)     | NR                  | Edmondson 1-2: 41 (72)      | ≥ 200: 23 (40)      |
| Wang LM                | PA-TACE      | 6.15 ± 3.65           | Single: 38 (90.5)   | NR                  | Edmondson 1-2: 25(59.5)     | ≥ 400: 17(40.5)     |
| 2017                   | HA           | 5.71 ± 2.60           | Single: 46 (92)     | NR                  | Edmondson 1-2: 32(64.0)     | ≥ 400: 18(36)       |

Abbreviations: AFP: Alpha Fetal Protein, PA-TACE: postoperative adjuvant transarterial chemoembolization, HA: hepatectomy alone, NR: not reported



**Supporting Table S3: Risk of bias assessment using Cochrane Collaboration's tool in the randomized clinical trial study included in the meta-analysis: Wei W (2018)**

| <b>Bias types</b>                                            | <b>Bias explanations</b>                                                                                                                                                                                                                                                                                             | <b>Assessment results</b> |
|--------------------------------------------------------------|----------------------------------------------------------------------------------------------------------------------------------------------------------------------------------------------------------------------------------------------------------------------------------------------------------------------|---------------------------|
| Random sequence generation<br>(selection bias)               | The eligible patients were randomly assigned (at a 1:1 ratio) to receive either 1–2 cycles of adjuvant TACE (Hepatectomy-TACE group) or routine follow-up without adjuvant treatment (Hepatectomy Alone group). Randomization was performed using a sealed envelope system according to a predesigned random number. | Low risk of bias          |
| Allocation concealment<br>(selection bias)                   | The authors regarded that lack of allocation concealment had no influence on the results of the study.                                                                                                                                                                                                               | Low risk of bias          |
| Blinding of participants and personnel<br>(performance bias) | The authors regarded that lack of blinding of participants and personnel had no influence on the results of the study.                                                                                                                                                                                               | Low risk of bias          |
| Blinding of outcome assessment<br>(detection bias)           | The authors regarded that lack of blinding of outcome assessment had no influence on the results of the study.                                                                                                                                                                                                       | Low risk of bias          |
| Incomplete outcome data addressed<br>(attrition bias)        | The withdrawal rates (4.0% vs. 3.2%) or follow-up loss rates (3.2% vs. 2.4%) were minimal and balanced between the two comparison groups.                                                                                                                                                                            | Low risk of bias          |
| Selective reporting<br>(reporting bias)                      | All of the study's outcomes that are of interest in the review have been reported in the pre-specified manner. The study was registered in ClinicalTrials.gov ( <a href="http://ClinicalTrials.gov">http://ClinicalTrials.gov</a> , trial number NCT02788526) on March 23, 2016                                      | Low risk of bias          |

**Supporting Table S4: Begg's and Egger's P values of the survival data**

|                        | Begg's P value | Egger's P value |
|------------------------|----------------|-----------------|
| 1-year recurrence rate | 0.711          | 0.303           |
| 3-year recurrence rate | 0.711          | 0.893           |
| 5-year recurrence rate | 0.462          | 0.811           |
| 1-year survival rate   | 0.711          | 0.631           |
| 3-year survival rate   | 0.711          | 0.958           |
| 5-year survival rate   | 1.000          | 0.894           |

The software used for statistical analysis: Stata (Version 14.0, Stata Corp LP, College Station, TX)

**Supporting Table S5: Most common side effect of TACE**

| Author<br>Year     | Nausea and<br>vomiting | Fever     | Pain       | Pulmonary<br>complication | Other side effect                   |
|--------------------|------------------------|-----------|------------|---------------------------|-------------------------------------|
| Wang H<br>2018     | NR                     | NR        | NR         | NR                        | NR                                  |
| Ye JZ<br>2017      | 46 (29.11)             | 35 (22.2) | 49 (31.0)  | 2 (1.3)                   | Alopecia 5 (3.2)                    |
| Sun JJ<br>2016     | 130, 94.9 %            | NR        | 32, 23.4 % | NR                        | Increase in ALT/ AST:<br>77, 56.2 % |
| Li KW<br>2012      | NR                     | NR        | NR         | NR                        | NR                                  |
| Wei W<br>2018      | nausea/vomiting        | Fever     | NR         | NR                        | Neutropenia, liver<br>dysfunction   |
| Qi YP<br>2018      | NR                     | 4, 4.4%   | 9, 9.9%    | NR                        | Increase ALT and AST:<br>26, 28.6%  |
| Wang<br>YY<br>2018 | NR                     | NR        | NR         | NR                        | NR                                  |
| Wang<br>LM<br>2017 | NR                     | NR        | NR         | NR                        | NR                                  |

NR: not reported

**Supporting Figure legend:**

Supporting Fig. 1. Funnel plots of the survival analysis. a: 1-year DFS, b: 3-year DFS, c: 5-year DFS, d: 1-year OS, e: 3-year OS, f: 5-year OS. DFS: Disease free survival, OS: Overall survival.

**Detail retrieval methods:**

(((((hepatectomy OR (hepatic resection) OR (liver resection)))) AND ((transcatheter arterial chemoembolization) OR tace)) AND ((microvascular invasion) OR MVI OR mivi OR (microscopic venous invasion)))) AND (HCC OR (hepatocellular carcinoma))
